# Supplementary material for: Leishmania major-Infected Phlebotomus duboscqi Sand Fly Bites Enhance Mast Cell Degranulation
Source: MDPI journal article supplement (doi:10.3390/pathogens12020207), 2023-01-28
Supplement: s1 [file s1]

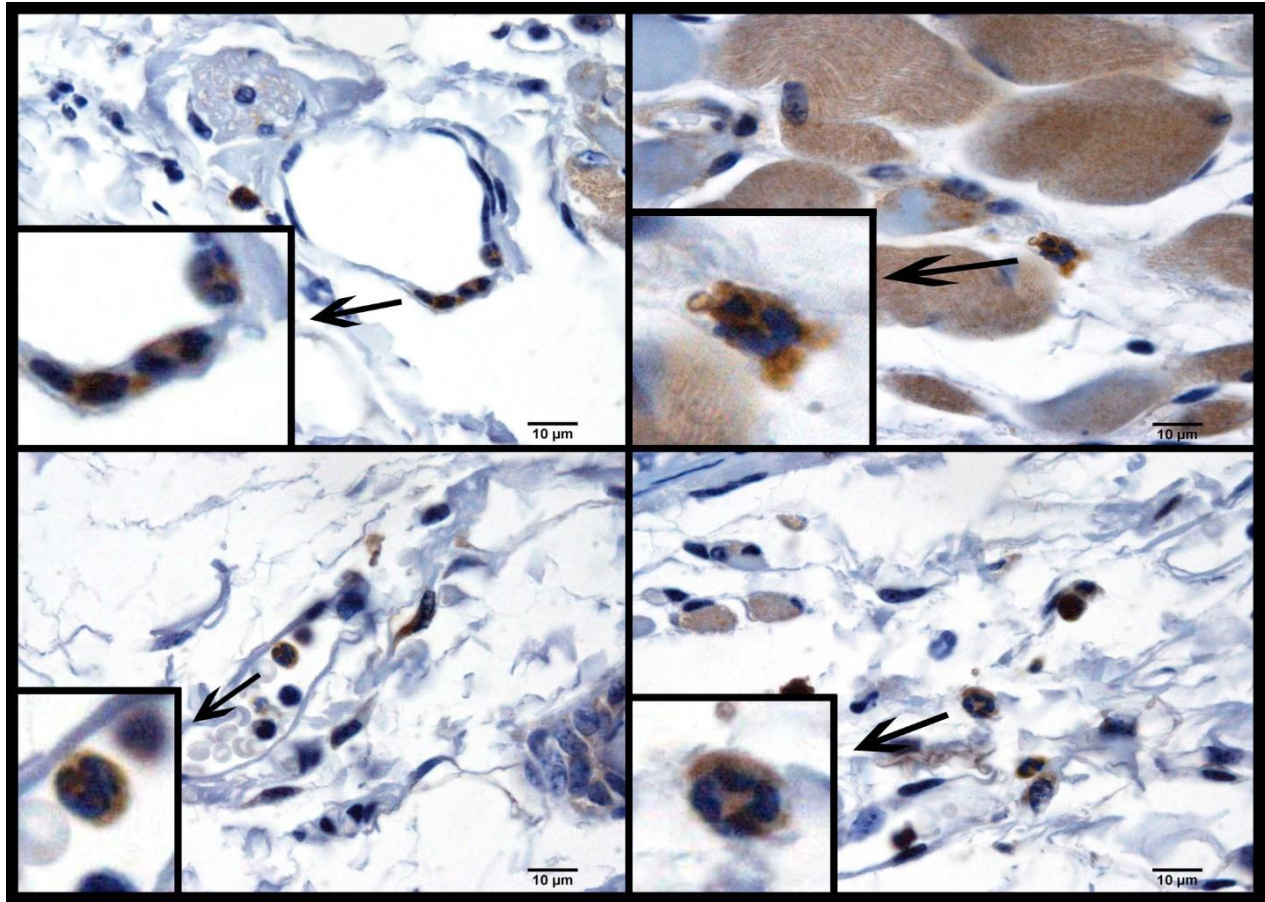

**Supplemental Figure S1.** Immunostaining of neutrophils for TNF-alpha in dermis of mice experimentally inoculated with *Leishmania*. Venules contain circulating, marginating or endothelium-adhered TNF-alfa-positive neutrophils, recognizable by 2 to 3 lobes of the nucleus (left panels). Extravascular neutrophils among muscle cells and in the connective tissue show cytoplasmic immunostaining for TNF-alfa (right panels). Arrows represent the enlarged image of the cells showing brown staining of TNF-alpha.
